# Supplementary material for: Designing a Library of Lived Experience for Mental Health: integrated realist synthesis and experience-based co-design study in UK mental health services
Source: HighWire-hosted journal article supplement (doi:10.1136/bmjopen-2023-081188), 2024-01-01
Supplement: bmjopen-2023-081188supp005_data_supplement.pdf [file bmjopen-2023-081188supp005_data_supplement.pdf]

## TITLE: Designing a Library of Lived Experience for Mental Health: integrated realist synthesis and experience-based co-design study

### Supplemental file 5 - Characteristics of included studies

| Author(s), year                  | Document type      | Setting, Country                                        | Aim/objective                                                                                                                                                                                                                                             | Book focus (General/focused)                                         | Readers sample                                |
|----------------------------------|--------------------|---------------------------------------------------------|-----------------------------------------------------------------------------------------------------------------------------------------------------------------------------------------------------------------------------------------------------------|----------------------------------------------------------------------|-----------------------------------------------|
| Ashmore (2010)                   | Journal article    | n/a, Canada                                             | '...provides a discussion of the development and implementation of living library programs in the context of creating and fostering community engagement in the library.'                                                                                 | n/a                                                                  | n/a                                           |
| Bagci & Blazhenkova (2020)       | Journal article    | University, Turkey                                      | '...tested the effectiveness of HL as a direct intergroup contact intervention on affective (trust, empathy), cognitive (knowledge), and behavioural (e.g., willingness to talk to outgroup members) aspects of outgroup attitudes'                       | General. Books included 'Schizophrenic'                              | University students                           |
| Blizzard, Becker, & Goebel, 2018 | Journal article    | University, Canada                                      | '...describe the Augustana human library and how the team has used the event to take a new approach to teaching information literacy.'                                                                                                                    | Focused. Books related to Women's Studies                            | University students                           |
| Chung, Tse, & Tasha, 2022        | Journal article    | Educational setting, Hong Kong                          | 'This study aimed to test the effectiveness of a human library intervention at enhancing MHL [mental health literacy]'                                                                                                                                    | Focused. Books on mental health (bipolar disorder and schizophrenia) | Young adults in tertiary education            |
| Constable & Harris, 2008         | Journal article    | Public libraries, UK                                    | '... to explore a community development model of Living Library within public libraries in England.'                                                                                                                                                      | General                                                              | Public                                        |
| Copenhagen & Koclanes, 2019      | Journal article    | University                                              | 'Raise awareness of social justice issues and to expose students to issues present in our local community'                                                                                                                                                | General                                                              | University staff/students and the public      |
| Dreher & Mowbray                 | Research monograph | Public and third sector organisations, Australia        | '...comprehensive and independent analysis of Human Libraries (formerly Living Libraries) in Australia'                                                                                                                                                   | Varied. Typically General                                            | Varied. Typically public.                     |
| Fortune & Leighton, 2022         | Journal article    | Community support centre for people with mental illness | 'we report on in this paper focused on the experiences of individuals living with mental illness who became living books for an initiative aimed at addressing stigma by dispelling stereotypes related to mental illness through inclusionary dialogue.' | Focused. Mental health                                               | Undergraduate therapeutic recreation students |
| Gamtso, Mannon, & Whipple, 2017  | Book chapter       | High school, university and public libraries, USA       | 'describe the planning and implementation of the New Hampshire program...and a discussion of the New Hampshire Human Library's impact on participants' learning.'                                                                                         | Varied. Typically General                                            | Students and/or the public                    |

## TITLE: Designing a Library of Lived Experience for Mental Health: integrated realist synthesis and experience-based co-design study

|                         |                  |                                         |                                                                                                                                                                                                                                                                                                      |                                                                                    |                                                |
|-------------------------|------------------|-----------------------------------------|------------------------------------------------------------------------------------------------------------------------------------------------------------------------------------------------------------------------------------------------------------------------------------------------------|------------------------------------------------------------------------------------|------------------------------------------------|
| Garbutt, 2008           | Conference paper | n/a, Australia                          | 'The purpose of this paper is to begin this theoretical discussion of living libraries and their aims.                                                                                                                                                                                               | n/a                                                                                | n/a                                            |
| Giesler, 2021           | Journal Article  | University, USA                         | ...explored two research questions: How do those in the role of enlisted participants (Books) describe the HL [human library] experience? and What potential does the HL have to create IGD [intergroup dialogue] in the social work classroom?'                                                     | General                                                                            | Social work students                           |
| Giesler 2020            | Magazine article | University, USA                         | Discusses 'What makes the Human Library so powerful? How can social work professionals and educators use it to weave together the profession's core values?'                                                                                                                                         | General                                                                            | University students                            |
| Giesler & Juarez, 2019  | Journal Article  | University, USA                         | '(1) to assess the power of the Living Library experience to bring people from disparate backgrounds ...(2) to discern how the Living Library project builds community...(3) to add to the literature outlining potential benefits and risks of veterans who tell their stories of military service. | Focused. Books on veterans' experiences                                            | Varied                                         |
| Groyecka et al., 2019   | Journal Article  | Public library, Poland                  | ...examined the effectiveness of the Human Library (held Wroclaw, Poland) in reducing social distance towards Roma, Muslims, dark-skinned, and transgender people, as well as in decreasing homonegativity.                                                                                          | General. Books included titles related to bulimia and anorexia, and schizophrenia. | Public                                         |
| Hewlin-Via et al., 2021 | Research poster  | University, Australia                   | 'To evaluate the changes in students' cultural awareness and sensitivity after attending the HL. To understand the perspective of student OTs [Occupational Therapists] in participating in the HL [Human Library] ...'                                                                              | General. Books included growing up with mental illness                             | Student occupational therapists                |
| Huang & Dobreski, 2017  | Conference paper | Public and university libraries, USA    | 'We present how libraries have attempted to utilize technologies and leverage community support to enable human library events.'                                                                                                                                                                     | General                                                                            | Students and/or the public                     |
| Inkster et al., 2016    | Research report  | Hospital, UK                            | 'to challenge prejudice in healthcare'.                                                                                                                                                                                                                                                              | General. Books included 'mental health problems'                                   | Healthcare staff                               |
| Kudo et al., 2011       | Conference paper | University, Japan                       | '...provides a first-person narrative of preparation, challenges and success of a one-day Human Library administered by 30 undergraduate students and their supervisor at a Japanese university.'                                                                                                    | General                                                                            | Public                                         |
| Kwan, 2020              | Journal article  | Mental health service centre, Hong Kong | 'explores the relevance and usefulness of this approach [living library] in a mental health setting'                                                                                                                                                                                                 | Focused. Books on mental health                                                    | People in recovery and other community members |

## TITLE: Designing a Library of Lived Experience for Mental Health: integrated realist synthesis and experience-based co-design study

|                          |                      |                            |                                                                                                                                                                                                                                                                                                                                                                                                                                                                             |                                                                                            |                                   |
|--------------------------|----------------------|----------------------------|-----------------------------------------------------------------------------------------------------------------------------------------------------------------------------------------------------------------------------------------------------------------------------------------------------------------------------------------------------------------------------------------------------------------------------------------------------------------------------|--------------------------------------------------------------------------------------------|-----------------------------------|
| Lam, Wong & Zhang, 2023  | Journal article      | n/a                        | '...his article aims to review the current body of knowledge on HL by conducting a systematic narrative review on the existing literature.'                                                                                                                                                                                                                                                                                                                                 | Varied                                                                                     | Varied.                           |
| Little et al., 2011      | Implementation guide | Various, Council of Europe | 'This guide is intended to provide support and direction to Living Library organisers in Europe.'                                                                                                                                                                                                                                                                                                                                                                           | General                                                                                    | Varied. Typically public.         |
| Michalak et al., 2019    | Journal article      | Online, Canada             | '... (1) to create an innovative Web-based Bipolar Wellness Centre, (2) to conduct a mixed-methods (i.e., quantitative and qualitative) evaluation to assess the impact of different sorts of engagement (i.e., knowledge translation [KT]), and (3) to support engagement with the self-management information in the Bipolar Wellness Centre'                                                                                                                             | Focused. Books were people with experience of bipolar disorder.                            | People with bipolar disorder      |
| Orosz et al., 2016       | Journal article      | High School, Hungary       | 'assesses the effectiveness of the Living Library intervention and tests whether and how perceived peer prejudices moderate its effectiveness in reducing prejudice toward Roma and LGBT people'                                                                                                                                                                                                                                                                            | Focused. Books were Roma and members of the LGBT community.                                | High school students              |
| Pardasani & Rivera, 2017 | Thesis               | University, Finland        | 'to serve as a guidebook in itself as a reference for the implementation guidelines, training and promotional material and a resource material for the future Human Library events at DIAK or any other social work institutions.'                                                                                                                                                                                                                                          | General. Books included people with anxiety and depression.                                | Students                          |
| Pratchett, 2019          | Blog                 | Hospital, UK               | 'to bring staff from different areas of the trust together and enable them to hear the lived experience of colleagues in their own words.'                                                                                                                                                                                                                                                                                                                                  | General.                                                                                   | Healthcare staff                  |
| Russell & Linsley, 2011  | Journal article      | University, UK             | 'The project centred on the running of a 'human library' event in which adult nursing and social work students engaged with mental health service users through an open forum'.                                                                                                                                                                                                                                                                                             | Focused. Mental health service users                                                       | Student nurses and social workers |
| Sen et al., 2016         | Journal article      | University, UK             | 'describes the running of four Living Libraries on a UK postgraduate social work course'                                                                                                                                                                                                                                                                                                                                                                                    | General & focused, with Books related to the experience of social care.                    | Student social workers            |
| Sen et al., 2021         | Book chapter         | Universities, UK & Finland | 'Two approaches are presented from two universities ... In the University of Sheffield (UK), people with experiences of social work services, teachers and students have developed living libraries as a regular feature of the syllabus for a qualifying master's degree programme in social work since 2014. In the Diaconia University of Applied Sciences (Diak, Finland), bachelor-level students in social services initiated and organised a Human Library event...' | General & focused, with stories related young people's experiences of social care services | Student social workers/Public     |

**TITLE: Designing a Library of Lived Experience for Mental Health: integrated realist synthesis and experience-based co-design study**

---

|                |        |                          |                                                                                                                                                                                                                    |         |        |
|----------------|--------|--------------------------|--------------------------------------------------------------------------------------------------------------------------------------------------------------------------------------------------------------------|---------|--------|
| Watson<br>2015 | Thesis | University,<br>Australia | 'The research question is: What does an examination of Human Library inform us about how people can challenge prejudice and increase respect for difference as a means for promoting humans' rights and freedoms?' | General | Public |
|----------------|--------|--------------------------|--------------------------------------------------------------------------------------------------------------------------------------------------------------------------------------------------------------------|---------|--------|

---
